# Supplementary material
Source: PubMed Central journal article supplement (PMC4338993)
Supplement: NIHMS658738-supplement-table.pdf [file NIHMS658738-supplement-table.pdf]

**On-line Table: ROC analysis with area under the ROC curve to determine the accuracy, sensitivity, and specificity of conventional and functional MRI in differentiation of benign and malignant peripheral nerve sheath tumors**

|                                     | AUC (95% CI)     | Cut off Value <sup>a</sup> | Sensitivity (95% CI) | Specificity (95% CI) | PPV              | NPV            |
|-------------------------------------|------------------|----------------------------|----------------------|----------------------|------------------|----------------|
| Diameter                            |                  |                            |                      |                      |                  |                |
| Maximum                             | 0.77 (0.59–0.90) | 4.5 cm                     | 100 (66.4–100)       | 52.2 (31–72)         | 47.3 (29.2–70.5) | 100 (71.5–100) |
| Average                             | 0.8 (0.66–0.94)  | 4.2 cm                     | 100 (66.4–100)       | 65.2 (44–74)         | 55.2 (29.7–78.6) | 100 (76.8–100) |
| Conventional MRI                    |                  |                            |                      |                      |                  |                |
| T1 (Hypointense to the muscle)      | 0.50 (0.31–0.68) | –                          | 100 (69–100)         | 0 (0–16.1)           | 30 (15–49)       | –              |
| T2 (Hyperintense to the muscle)     | 0.50 (0.31–0.68) | –                          | 100 (69–100)         | 0 (0–16.1)           | 30 (15–49)       | –              |
| Following features present:         |                  |                            |                      |                      |                  |                |
| Ill-defined or infiltrative margins | 0.68 (0.49–0.84) | –                          | 70 (35–93)           | 66.7 (43–85)         | 47.4 (20–76)     | 83.8 (58–97)   |
| Irregular shape                     | 0.56 (0.37–0.73) | –                          | 100 (66–100)         | 13 (2.8–33.6)        | 33 (16.8–52.9)   | 100 (15.8–100) |
| Split fat sign                      | 0.60 (0.45–0.74) | –                          | 88.2 (52–99.7)       | 30.4 (13.2–52.7)     | 38.8 (23–78)     | 98.1 (63–100)  |
| Target sign                         | 0.58 (0.39–0.76) | –                          | 100 (69–100)         | 10.1 (2.5–24.8)      | 34.2 (17.1–53.9) | 100 (23.7–100) |
| T1 heterogeneity (>50%)             | 0.52 (0.34–0.71) | –                          | 100 (69–100)         | 4.8 (0.1–23.8)       | 31 (15.1–50.8)   | 100 (2.5–100)  |
| T2 heterogeneity (>50%)             | 0.58 (0.39–0.76) | –                          | 100 (69–100)         | 10.1 (2.5–24.8)      | 34.2 (17.1–53.9) | 100 (23.7–100) |
| Peritumoral edema                   | 0.68 (0.49–0.84) | –                          | 60 (26–88)           | 76.2 (53–92)         | 51.9 (20–83)     | 81.6 (58–95)   |
| Eccentric to the nerve              | 0.57 (0.29–0.82) | –                          | 14.3 (0–58)          | 100 (63–100)         | 100 (50–100)     | 73.1 (44–93)   |
| Vascular encasement                 | 0.55 (0.35–0.72) | –                          | 100 (69–100)         | 9.5 (1–34)           | 32 (15–52)       | 100 (15–100)   |
| Periosteal/cortical invasion        | 0.50 (0.31–0.68) | –                          | 100 (69–100)         | 0 (0–16.1)           | 30 (15–49)       | –              |
| Bone marrow invasion                | 0.50 (0.31–0.68) | –                          | 100 (69–100)         | 0 (0–16.1)           | 30 (15–49)       | –              |
| Joint extension                     | 0.50 (0.31–0.68) | –                          | 100 (69–100)         | 0 (0–16.1)           | 30 (15–49)       | –              |
| Delayed contrast enhancement        | 0.55 (0.35–0.72) | –                          | 100 (69–100)         | 9.5 (1–34)           | 32 (15–52)       | 100 (15–100)   |
| Percentage of enhancement           | 0.60 (0.26–0.88) | >50%                       | 60 (26–88)           | 72.2 (46–90)         | 47.8 (24–80)     | 93.1 (63–100)  |
| Functional MRI                      |                  |                            |                      |                      |                  |                |
| DWI/ADC mapping (mean)              |                  |                            |                      |                      |                  |                |
| Average                             | 0.63 (0.43–0.76) | 1.9                        | 100 (66.4–100)       | 22.7 (7.8–45.4)      | 35.7 (18–56.7)   | 100 (39.8–100) |
| Minimum                             | 0.89 (0.73–0.97) | 1.0                        | 100 (66.4–100)       | 68.2 (45.1–86.1)     | 57.4 (30.9–81.1) | 100 (76.8–100) |
| DCE-MRI                             |                  |                            |                      |                      |                  |                |
| Early arterial enhancement          | 0.69 (0.46–0.86) | –                          | 44.4 (13–78)         | 92.9 (66–100)        | 72.7 (18–99)     | 79.6 (54–95)   |

**Note:**—PPV indicates positive predictive value; NPV, negative predictive value; –, no cut off value was defined.

<sup>a</sup> Cut off values for continuous variables was obtained using Youden's index analysis.
